# Supplementary material
Source: PubMed Central journal article supplement (PMC7544567)
Supplement: mmc1.pdf [file mmc1.pdf]

**Supplemental Table 1.** Complete profile of plasma phospholipid FA concentrations averaged from samples d 1, 2, 4, 7, and 14.

| Plasma Phospholipid<br>FA <sup>2</sup> (g/100g) | Treatment <sup>1</sup> |      |      |       |                |                |                | Overall<br><i>P</i> -value <sup>6</sup> |
|-------------------------------------------------|------------------------|------|------|-------|----------------|----------------|----------------|-----------------------------------------|
|                                                 | CON                    | FF30 | FF60 | FF120 | L <sup>3</sup> | Q <sup>4</sup> | C <sup>5</sup> |                                         |
| C12:0                                           | 0.02                   | 0.02 | 0.02 | 0.02  | 0.20           | 0.87           | 0.13           | 0.26                                    |
| C16:0                                           | 20.4                   | 20.1 | 20.7 | 20.5  | 0.53           | 0.74           | 0.25           | 0.60                                    |
| C16:1 7c/8c                                     | 0.31                   | 0.29 | 0.30 | 0.28  | 0.19           | 0.87           | 0.37           | 0.45                                    |
| C16:1 9c                                        | 0.79                   | 0.72 | 0.67 | 0.66  | 0.01           | 0.17           | 0.94           | 0.05                                    |
| C16:1 10c/13t                                   | 0.05                   | 0.06 | 0.06 | 0.06  | 0.19           | 0.25           | 0.68           | 0.36                                    |
| C16:1 11c                                       | 0.06                   | 0.05 | 0.04 | 0.04  | 0.04           | 0.10           | 0.66           | 0.07                                    |
| C17:0                                           | 0.50                   | 0.78 | 0.49 | 0.49  | 0.87           | 0.59           | 0.45           | 0.81                                    |
| C18:0                                           | 21.1                   | 22.1 | 21.9 | 22.1  | 0.07           | 0.16           | 0.19           | 0.09                                    |
| C18:1 6-8t                                      | 0.07                   | 0.06 | 0.05 | 0.05  | 0.001          | 0.09           | 0.63           | 0.01                                    |
| C18:1 9t                                        | 0.07                   | 0.08 | 0.08 | 0.08  | 0.07           | 0.44           | 0.93           | 0.22                                    |
| C18:1 10t                                       | 0.02                   | 0.03 | 0.03 | 0.03  | 0.43           | 0.89           | 0.34           | 0.65                                    |
| C18:1 11t                                       | 0.19                   | 0.17 | 0.18 | 0.18  | 0.81           | 0.33           | 0.66           | 0.73                                    |
| C18:1 12t                                       | 0.12                   | 0.11 | 0.11 | 0.11  | 0.93           | 0.46           | 0.84           | 0.88                                    |
| C18:1 6-8c/13/14t                               | 0.15                   | 0.14 | 0.12 | 0.13  | 0.40           | 0.16           | 0.34           | 0.31                                    |
| C18:1 9c                                        | 21.0                   | 17.9 | 17.1 | 17.0  | <0.001         | 0.006          | 0.42           | <0.001                                  |
| C18:1 11c                                       | 2.65                   | 2.64 | 2.45 | 2.43  | 0.08           | 0.65           | 0.40           | 0.24                                    |
| C18:1 12c                                       | 0.13                   | 0.12 | 0.11 | 0.11  | 0.01           | 0.28           | 0.98           | 0.05                                    |
| C18:1 13c                                       | 0.21                   | 0.20 | 0.17 | 0.19  | 0.13           | 0.08           | 0.39           | 0.12                                    |
| C18:1 14c/16t                                   | 0.08                   | 0.07 | 0.07 | 0.07  | 0.92           | 0.11           | 0.98           | 0.42                                    |
| C19:0                                           | 0.08                   | 0.08 | 0.09 | 0.08  | 0.40           | 0.79           | 0.51           | 0.74                                    |
| C18:2 (n-6; LA)                                 | 18.2                   | 19.9 | 21.0 | 19.7  | 0.22           | 0.04           | 0.87           | 0.12                                    |
| C18:3 (n-3; ALA)                                | 0.35                   | 0.88 | 1.13 | 1.27  | <0.001         | <0.001         | 0.13           | <0.001                                  |
| CLA 9c, 11t                                     | 0.09                   | 0.09 | 0.07 | 0.07  | 0.02           | 0.37           | 0.27           | 0.07                                    |
| C20:0                                           | 0.07                   | 0.07 | 0.06 | 0.06  | 0.31           | 0.75           | 0.42           | 0.60                                    |
| C20:2 (n-6)                                     | 0.24                   | 0.24 | 0.24 | 0.21  | 0.19           | 0.48           | 0.99           | 0.51                                    |
| C20:3 (n-9)                                     | 0.22                   | 0.20 | 0.13 | 0.17  | 0.20           | 0.10           | 0.30           | 0.16                                    |
| C20:3 (n-6)                                     | 1.74                   | 1.58 | 1.37 | 1.17  | 0.004          | 0.63           | 0.79           | 0.03                                    |

|                  |      |      |      |      |        |      |      |        |
|------------------|------|------|------|------|--------|------|------|--------|
| C22:0            | 0.04 | 0.04 | 0.04 | 0.04 | 0.76   | 0.82 | 0.84 | 0.98   |
| C20:4 (n-6; ARA) | 4.62 | 4.37 | 4.16 | 4.27 | 0.63   | 0.65 | 0.93 | 0.92   |
| C23:0            | 0.08 | 0.08 | 0.09 | 0.10 | 0.13   | 0.67 | 0.80 | 0.45   |
| C20:5 (n-3; EPA) | 0.42 | 0.76 | 1.29 | 1.75 | <0.001 | 0.02 | 0.65 | <0.001 |
| C24:0            | 0.03 | 0.03 | 0.04 | 0.03 | 0.97   | 0.12 | 0.44 | 0.37   |
| C22:4 (n-6)      | 0.34 | 0.33 | 0.24 | 0.24 | 0.17   | 0.68 | 0.47 | 0.44   |
| C22:5 (n-6)      | 0.11 | 0.12 | 0.08 | 0.08 | 0.23   | 0.64 | 0.35 | 0.46   |
| C22:5 (n-3)      | 1.36 | 1.36 | 1.34 | 1.55 | 0.11   | 0.29 | 0.70 | 0.28   |
| C22:6 (n-3; DHA) | 1.22 | 1.56 | 1.71 | 2.16 | <0.001 | 0.65 | 0.52 | <0.001 |
| Σ SFA            | 38.9 | 39.6 | 39.8 | 39.5 | 0.11   | 0.03 | 0.69 | 0.07   |
| Σ MUFA           | 23.8 | 22.9 | 21.1 | 21.5 | 0.008  | 0.08 | 0.30 | 0.02   |
| Σ PUFA           | 26.3 | 28.5 | 29.6 | 29.8 | <0.001 | 0.02 | 0.85 | 0.002  |
| Σ n-3 FA         | 3.44 | 4.59 | 5.64 | 6.95 | <0.001 | 0.02 | 0.94 | <0.001 |
| Σ n-6 FA         | 25.3 | 26.7 | 27.2 | 25.8 | 0.83   | 0.06 | 0.98 | 0.27   |
| Σ n-6 FA:n-3 FA  | 6.99 | 5.47 | 4.66 | 3.38 | <0.001 | 0.42 | 0.68 | <0.001 |

<sup>1</sup>Treatments (n = 6): CON = control, no supplement added to colostrum; FF30 = 30 mL 1:1 ratio fish and flaxseed oil blend added to colostrum; FF60 = 60 mL 1:1 ratio fish and flaxseed oil blend added to colostrum; FF120 = 120 mL 1:1 ratio fish and flaxseed oil blend added to colostrum.

<sup>2</sup>Plasma phospholipid FA: linoleic acid (LA);  $\alpha$ -linolenic acid (ALA); arachidonic acid (ARA); eicosapentaenoic acid (EPA); docosahexaenoic acid (DHA).

<sup>3</sup>L = linear polynomial contrast.

<sup>4</sup>Q = quadratic polynomial contrast.

<sup>5</sup>C = cubic polynomial contrast.

<sup>6</sup>Overall *P*-value = treatment effect *P*-value.

**Supplemental Table 2.** Least squares means of plasma oxylipid concentrations on average d 1, 2, 4, and 7.

| Oxylipid <sup>2</sup> Plasma Concentrations (nM) | PUFA Substrate <sup>3</sup> | Oxidative Pathway <sup>4</sup> | Treatments <sup>1</sup> |          |          |           |                |                |                | Overall P-value <sup>8</sup> |
|--------------------------------------------------|-----------------------------|--------------------------------|-------------------------|----------|----------|-----------|----------------|----------------|----------------|------------------------------|
|                                                  |                             |                                | CON                     | FF3<br>0 | FF6<br>0 | FF12<br>0 | L <sup>5</sup> | Q <sup>6</sup> | C <sup>7</sup> |                              |
| 11,12-DHET                                       | AA                          | CYP                            | 50.6                    | 64.7     | 59.2     | 49.9      | 0.59           | 0.13           | 0.37           | 0.39                         |
| 12,13-EpOME                                      | LA                          | CYP                            | 2.78                    | 4.93     | 4.36     | 3.82      | 0.51           | 0.1            | 0.29           | 0.23                         |
| 17,18-DiHETE                                     | EPA                         | CYP                            | 2460                    | 5340     | 6620     | 6370      | 0.008          | 0.02           | 0.56           | 0.01                         |
| 12,13-DiHOME                                     | LA                          | CYP                            | 1.98                    | 2.21     | 2.42     | 2.12      | 0.74           | 0.30           | 0.84           | 0.74                         |
| 13-HODE                                          | LA                          | LOX                            | 110                     | 137      | 140      | 129       | 0.37           | 0.10           | 0.65           | 0.29                         |
| 14,15-DiHETE                                     | EPA                         | CYP                            | 163                     | 271      | 335      | 352       | 0.004          | 0.003          | 0.09           | <0.001                       |
| 12-HHTrte                                        | AA                          | COX                            | 2.73                    | 3.03     | 3.39     | 3.52      | 0.35           | 0.72           | 0.92           | 0.78                         |
| 13-OxODE                                         | LA                          | LOX                            | 29.2                    | 28       | 29.3     | 26.5      | 0.12           | 0.49           | 0.30           | 0.27                         |
| 15-HETE                                          | AA                          | LOX                            | 14.7                    | 16.9     | 16.4     | 19.4      | 0.07           | 0.99           | 0.43           | 0.24                         |
| 15-OxoETE                                        | AA                          | LOX                            | 0.147                   | 0.198    | 0.146    | 0.138     | 0.74           | 0.75           | 0.54           | 0.89                         |
| 15d-PGJ2                                         | AA                          | COX                            | 306                     | 256      | 363      | 265       | 0.80           | 0.55           | 0.21           | 0.55                         |
| 17-HDoHE                                         | DHA                         | COX/LOX                        | 4.43                    | 4.77     | 4.56     | 6.29      | 0.17           | 0.57           | 0.67           | 0.49                         |
| 19,20-DiHDPA                                     | DHA                         | CYP                            | 216                     | 340      | 330      | 335       | 0.02           | 0.02           | 0.16           | 0.01                         |
| 19,20-EpDPE                                      | DHA                         | CYP                            | 45.4                    | 56.2     | 64.9     | 75.4      | 0.03           | 0.53           | 0.96           | 0.14                         |
| 20-HETE                                          | AA                          | CYP                            | 130                     | 167      | 159      | 136       | 0.93           | 0.29           | 0.64           | 0.70                         |
| 5,6-DiHETE                                       | EPA                         | CYP                            | 21.4                    | 29.1     | 36.4     | 68.3      | <0.001         | 0.85           | 0.76           | <0.001                       |
| 5,6-LXA <sub>4</sub>                             | AA                          | LOX                            | 0.507                   | 1.05     | 1.04     | 1.56      | 0.02           | 0.36           | 0.35           | 0.06                         |
| 5-HETE                                           | AA                          | LOX                            | 7.68                    | 9.26     | 10.5     | 11        | 0.06           | 0.35           | 0.98           | 0.20                         |
| 5-OxoETE                                         | AA                          | LOX                            | 1.2                     | 1.26     | 1.25     | 1.16      | 0.88           | 0.82           | 0.97           | 0.99                         |
| 8,9-DHET                                         | AA                          | CYP                            | 12.5                    | 17.6     | 12.8     | 13.2      | 0.68           | 0.32           | 0.03           | 0.14                         |
| 9,10-DiHOME                                      | LA                          | CYP                            | 7.8                     | 9.12     | 10.2     | 9.69      | 0.21           | 0.24           | 0.9            | 0.38                         |
| 9,10-EpOME                                       | LA                          | CYP                            | 1.73                    | 2.27     | 2.16     | 2.14      | 0.43           | 0.32           | 0.48           | 0.54                         |
| 9-HETE                                           | AA                          | Non                            | 1.48                    | 1.93     | 1.41     | 1.75      | 0.8            | 0.94           | 0.25           | 0.68                         |
| 9-HODE                                           | LA                          | LOX/Non                        | 51.9                    | 62.6     | 62.5     | 62.9      | 0.17           | 0.22           | 0.51           | 0.28                         |

|                  |     |     |            |           |           |       |      |      |      |      |
|------------------|-----|-----|------------|-----------|-----------|-------|------|------|------|------|
| 9-OxoODE         | LA  | LOX | 50.3       | 53.2      | 53.9      | 53.3  | 0.55 | 0.52 | 0.89 | 0.84 |
| LTB <sub>4</sub> | AA  | LOX | 0.571      | 0.94<br>1 | 1.25      | 1.07  | 0.03 | 0.03 | 0.97 | 0.03 |
| PGD <sub>2</sub> | AA  | COX | 0.94       | 0.98      | 0.97      | 1.01  | 0.84 | 0.97 | 0.93 | 1.00 |
| PGE <sub>2</sub> | AA  | COX | 3.86       | 8.82      | 5.81      | 8.08  | 0.31 | 0.54 | 0.22 | 0.40 |
| Resolvin D1      | DHA | LOX | 0.089<br>3 | 0.14<br>9 | 0.05<br>3 | 0.072 | 0.22 | 0.75 | 0.03 | 0.09 |
| Resolvin D2      | DHA | LOX | 0.703      | 0.71<br>9 | 0.57      | 0.733 | 0.99 | 0.4  | 0.28 | 0.58 |
| TXB <sub>2</sub> | AA  | COX | 9.53       | 9.18      | 7.45      | 6.57  | 0.05 | 0.88 | 0.56 | 0.21 |
| 11,12-EET        | AA  | CYP | 1.48       | 1.07      | 1.1       | 1.32  | 0.85 | 0.17 | 0.63 | 0.50 |

<sup>1</sup>Treatments (n = 6): CON = control, no supplement added to colostrum; FF30 = 30 mL 1:1 ratio fish and flaxseed oil blend added to colostrum; FF60 = 60 mL 1:1 ratio fish and flaxseed oil blend added to colostrum; FF120 = 120 mL 1:1 ratio fish and flaxseed oil blend added to colostrum.

<sup>2</sup>Oxylipids: dihydroxy-eicosatrienoic acid (DHET); epoxyoctadecenoic acid (EpOME); dihydroxy-eicosatetraenoic acid (DiHETE); dihydroxy-octadecenoic acid (DiHOME); hydroxy-octadecadienoic acid (HODE); hydroxy-heptadecatrienoic acid (HHTrte); oxo-octadecadienoic acid (OxODE); hydroxy-eicosatetraenoic acid (HETE); oxo-eicosatetraenoic acid (OxoETE); prostaglandin J (PGJ); hydroxy-docosahexaenoic acid (HDoHE); dihydroxy-docosapentaenoic acid (DiHDPA); epoxy-docosapentaenoic acid (EpDPE); lipoxin A (LXA); leukotriene B (LTB); prostaglandin D (PGD); prostaglandin E (PGE); thromboxane (TXB); epoxy-eicosatrienoic acid (EET).

<sup>3</sup>Substrates: arachidonic acid (AA); linoleic acid (LA); eicosapentaenoic acid (EPA); docosahexaenoic acid (DHA).

<sup>4</sup>Pathways: lipoxygenase (LOX); cyclooxygenase (COX); cytochrome P450 (CYP); non-enzymatic (Non).

<sup>5</sup>L = linear polynomial contrast.

<sup>6</sup>Q = quadratic polynomial contrast.

<sup>7</sup>C = cubic polynomial contrast.

<sup>8</sup>Overall *P*-value = treatment effect *P*-value.

**Supplemental Table 3.** Least squares means of plasma isoprostane concentrations on average d 1, 2, 4, and 7.

| Isoprostane <sup>2</sup> Plasma Concentrations (nM) | PUFA Substrate <sup>3</sup> | Oxidative Pathway <sup>4</sup> | Treatment <sup>1</sup> |       |       |       | L <sup>3</sup> | Q <sup>4</sup> | C <sup>5</sup>    | Overall P-value <sup>6</sup> |
|-----------------------------------------------------|-----------------------------|--------------------------------|------------------------|-------|-------|-------|----------------|----------------|-------------------|------------------------------|
|                                                     |                             |                                | CON                    | FF30  | FF60  | FF120 |                |                |                   |                              |
| 6-keto-PGF <sub>1α</sub>                            | AA                          | COX                            | 6.68                   | 6.23  | 5.73  | 7.09  | 0.75           | 0.37           | 0.80              | 0.80                         |
| 2,3-dinor-8-iso-PGF <sub>2α</sub>                   | AA                          | Non                            | 0.221                  | 0.306 | 0.283 | 0.332 | 0.37           | 0.71           | 0.60              | 0.73                         |
| 5-iPF <sub>2α</sub> -VI                             | AA                          | Non                            | 1.07                   | 1.09  | 1.04  | 0.97  | 0.56           | 0.82           | 0.88              | 0.93                         |
| 8-12-iso-iPF <sub>2α</sub> -VI                      | AA                          | Non                            | 4.11                   | 4.3   | 4.09  | 4.1   | 0.86           | 0.86           | 0.63              | 0.96                         |
| 8-iso-15KETO-PGE <sub>2</sub>                       | AA                          | Non                            | 2.09                   | 1.78  | 2.13  | 1.97  | 0.98           | 0.91           | 0.27              | 0.72                         |
| 8-iso-15R-PGF <sub>2α</sub>                         | AA                          | Non                            | 0.345                  | 0.365 | 0.407 | 0.591 | 0.13           | 0.72           | 0.99              | 0.46                         |
| 8-iso PGA1                                          | AA                          | Non                            | 0.144                  | 0.109 | 0.122 | 0.168 | 0.43           | 0.25           | 0.66              | 0.53                         |
| 8-iso PGA2                                          | AA                          | Non                            | 0.712                  | 0.289 | 0.481 | 0.554 | 0.98           | 0.02           | 0.00 <sub>8</sub> | 0.01                         |
| 8-iso-PGF <sub>2α</sub>                             | AA                          | Non                            | 2.45                   | 2.66  | 3.77  | 2.8   | 0.64           | 0.32           | 0.49              | 0.61                         |
| PGF <sub>2α</sub>                                   | AA                          | COX                            | 0.992                  | 0.646 | 0.938 | 0.825 | 0.86           | 0.65           | 0.18              | 0.51                         |

<sup>1</sup>Treatments (n=6): CON = control, no supplement added to colostrum; FF30 = 30 mL 1:1 ratio fish and flaxseed oil blend added to colostrum; FF60 = 60 mL 1:1 ratio fish and flaxseed oil blend added to colostrum; FF120 = 120 mL 1:1 ratio fish and flaxseed oil blend added to colostrum.

<sup>2</sup>Isoprostanes: prostaglandin (PG).

<sup>3</sup>Substrate: arachidonic acid (AA).

<sup>4</sup>Pathway: cyclooxygenase (COX); non-enzymatic (Non).

<sup>5</sup>L = linear polynomial contrast.

<sup>6</sup>Q = quadratic polynomial contrast.

<sup>7</sup>C = cubic polynomial contrast.

<sup>8</sup>Overall P-value = treatment effect P-value.
